# Supplementary material for: The Association of Health Literacy with High-Quality Home Blood Pressure Monitoring for Hypertensive Patients in Outpatient Settings
Source: Int J Hypertens. 2020 Mar 31;2020:7502468. doi: 10.1155/2020/7502468 (PMC7150690; doi:10.1155/2020/7502468)
Supplement: Supplementary Materials — Table 3: quality assessment of the selected interventional studies. [file 7502468.f1.xlsx]

## Sheet: Table 3
Table 3 Quality Assessment of the selected interventional studies
	Lead Author [Ref] Country, Year	Random sequence generation	Allocation concealment	Performance bias_blinding	Detection bias_blinding outcome	Attrition_ Incomplete data outcome	Reporting Bias	Risk of Bias	Study Design	Inconsistency	Indirectness	Imprecision	Publication Bias	Quality of Evidence
	Bachmann L.M. [ ] Switzerland 2002	drawing lots in a masked fashion	sealed numbered opaque envelopes	Blinded	BP records in validated automated monitor	randomised: 48 Data available at 14 days: 40	intention to treat	Low	RCT	No	No	lower unclear sample size calculation	undetected	⊕⊕⊕ Moderate
	Binstock M.L. [ } USA 1988	Unclear	Unclear	Unclear	Unclear	Unclear	Unclear	unclear	RCT	unclear	No	lower unclear sample size calculation	undetected	⊕ Low
	Brenna T. [ ] USA, 2010	Unclear	Unclear	Blinded	Unclear	randomised: 638 Data available at 6 month: 485 (76%)	Unclear	unclear	cRCT	significant difference of baseline BP not explained	no	lower unclear sample size calculation	undetected	⊕⊕ Low to moderate
	Dejesus R.S. [ ] USA, 2009	Unclear	Unclear	Unclear	Unclear	randomised: 54 Data available at 6 month: 24 (44%)	intention to treat	unclear	RCT	No	no	lower small sample size	undetected	⊕ Low
	Figar S. [ ] Argentina, 2006	random number table	Unclear	Blinded	blinded	randomised: 60 Data available at 6 month: 24 (44%)	intention to treat	moderate	RCT	No	No	lower low effect size	undetected	⊕⊕ Low to moderate
	Fung CS [ ] Hong Kong 2003	Unclear	Unclear	single blinded	not blinded	randomised: 240 Data available at 6 month: 218 (90.8%)	intention to treat	unclear	cRCT	No	No	no	undetected	⊕⊕⊕⊕ High to Moderate
	Green B.B. [ ] USA 2008	sequential number	sealed numbered opaque envelopes	Blinded	Blinded	randomised: 778 Data available at 12 month: 730 (93.8%)	intention to treat	low	RCT	No	No	no	undetected	⊕⊕⊕⊕⊕ High
	Haynes RB [ ] Canada 1976	Unclear	Unclear	Blinded	unclear	randomised: 38 Data available at 12 month: 38 (100%)	Unclear	unclear	RCT	unclear	No	No	undetected	⊕⊕ Low to moderate
	Kauric K.Z. [ ] USA, 2007	random number table	sealed numbered opaque envelopes	Unclear	unclear	randomised: 36 Data available at 3 month: 34 (94.4%)	complete case analysis	low to moderate	RCT	no	no	No	undetected	⊕⊕⊕⊕ High to Moderate
	Kim K.B. [31] USA, 2014	Unclear	Unclear	Yes	Yes	randomised: 369 Data available at 3 month: 440 (83.8%)	intention to treat	Unclear	RCT	No	No	No	undetected	⊕⊕⊕ Moderate
	Maciejewski M.L. [ ] USA, 2014	Unclear	Unclear	unclear	unclear	randomised: 591 Data available at 3 month: 591 (100%)	unclear	unclear	RCT	unclear	No	No	undetected	unclear
	Magid DJ [ ] USA 2011	computer generated random number	concealed	unclear	Yes	randomised: 283 Data available at 6 month: 338 (83.7%)	unclear	low to moderate	RCT	Baseline BP of intervention group > control group	No	No	undetected	⊕⊕⊕ Moderate
	Morgado M [ ] Portugal 2011	computer generated random number	sealed numbered opaque envelopes	No	Yes	randomised: 52 Data available at 6 month: 46 (88.4%)	intention to treat	low	RCT	No	No	No	undetected	⊕⊕⊕⊕⊕ High
	Nessman DG [ ] USA, 1980	Unclear	Unclear	unclear	unclear	randomised: 197 Data available at 9 month: 190 (96.4%)	unclear	unclear	RCT	No	No	unclear	Undetected	unclear
	Ogedegbe G. [15] USA 2014	Yes	Unclear	Yes	Yes	randomised: 1039 Data available at 12 month: 952 (91.6%)	intention to treat	Unclear	RCT	No	No	No	undetected	⊕⊕⊕ Moderate
	Victor RG [ ] USA, 2011	Unclear	Unclear	No	Yes	randomised: 1297 Data available at 10 month: 1022 (78.8%)	intention to treat	unclear	cRCT	No	No	No	undetected	⊕⊕⊕ Moderate
	Yi SS [ ] USA, 2015	software "smartform"	Yes	unclear	unclear	randomised: 828 Data available at 7-10 month: 661(79.8%)	unclear	unclear	RCT	No	No	Yes	undetected	⊕⊕ Low to moderate
	Yoo HJ [ ] Korea 2009	Unclear	Unclear	unclear	unclear	randomised: 111 Data available at 3 month: 111(100%)	intention to treat	unclear	RCT	No	No	No	undetected	⊕⊕⊕ Moderate
	Zillich AJ [ ] USA 2005	Unclear	Unclear	unblinded	unblinded	randomised: 125 Data available at 3 month: 117(93.6%)	imputation method	moderate to high	cRCT	No	No	No	Undetected	⊕⊕ Low to moderate
